# Supplementary material
Source: publisher site journal article supplement (https://www.dovepress.com/article/502725)
Supplement: Supplementary file 1 [file get_supplementary_file.php]

Supplementary Table 1: Resuscitation Documentation Improvement Measures

| **Failure Mode** | **Failure Cause** | **Corrective Actions** | **RPN Score** |
| --- | --- | --- | --- |
| Illegible handwriting, alterations, unrecognizable entries, and typographical errors | • Inadequate quality control by management in nursing documentation processes  • Nurses' weak legal awareness and insufficient risk prevention consciousness  • Careless documentation practices | • Implement a three-tier quality control system: 1) Staff nurses follow documentation standards, 2) Quality control team leaders/resuscitation supervisors conduct reviews, 3) Nurse managers perform final oversight  • Enhance legal education and risk management training for nursing staff | 438.2 |
| Missing documentation entries | • Insufficient understanding of resuscitation documentation importance  • Inadequate documentation training for junior nurses | • Strengthen legal education and documentation skill training programs  • Develop competency-based training modules for resuscitation record-keeping | 411.3 |
| Inaccurate documentation, inconsistencies between medical and nursing records | • Poor interprofessional communication  • Inadequate post-resuscitation verification processes  • Time pressure during emergencies leading to documentation neglect | • Establish standardized medical-nursing communication protocol (SBAR: Situation-Background-Assessment-Recommendation)  • Develop verbal order documentation checklist  • Implement mandatory medical-nursing record reconciliation process post-resuscitation | 352.0 |
| Inaccurate documentation of special treatments, medication administration, and care procedures | • Insufficient training on specialized procedure documentation  • Cognitive overload during emergencies leading to recall errors | • Implement specialty-specific documentation training programs  • Design streamlined temporary order documentation templates  • Establish real-time documentation support system during critical events | 338.2 |
| Incomplete documentation of nursing interventions, lack of specificity | • Knowledge-practice gap in clinical documentation  • Inadequate clinical judgment skills among junior nurses  • Failure to recognize critical documentation elements | • Enhance specialized clinical knowledge training programs  • Develop clinical decision-making simulation training with focus on:  - Patient condition monitoring  - Therapeutic intervention documentation  - Medication effect observation  • Implement competency-based documentation assessment system for junior nursing staff | 315 |
